# Supplementary material for: Riparian Soil Pollution Caused by Sediment Metal Transport: Seasonal Changes and Ecological Risk Assessment
Source: MDPI journal article supplement (doi:10.3390/toxics12030213), 2024-03-13
Supplement: s1 [file s1]

## SUPPLEMENTARY MATERIAL

**Table S1.** Seasonal and spatial average metal concentration (mg/kg) of the sediment.

|          |        | Ba   | Cr   | Co   | Cu   | Fe    | Pb    | Mn    | Ni   | P     | V    | Zn   | Al    |
|----------|--------|------|------|------|------|-------|-------|-------|------|-------|------|------|-------|
| Seasonal | Autumn | 80.3 | 57.3 | 14.0 | 29.2 | 32792 | 5.111 | 636.6 | 50.9 | 605.7 | 78.0 | 41.9 | 21090 |
|          | Winter | 68.5 | 43.0 | 14.5 | 30.7 | 34478 | 6.622 | 536.7 | 47.9 | 518.8 | 65.1 | 46.5 | 25659 |
|          | Spring | 69.6 | 48.6 | 14.6 | 35.4 | 35256 | 6.244 | 596.3 | 50.3 | 440.6 | 69.0 | 42.7 | 25590 |
|          | Summer | 61.3 | 42.5 | 14.3 | 27.9 | 32056 | 6.378 | 559.9 | 46.7 | 469.4 | 59.1 | 40.8 | 24599 |

**Table S2.** Seasonal and spatial average metal concentration (mg/kg) of the soil.

|          | Soil   | Ba    | Cr   | Co   | Cu   | Fe    | Pb   | Mn    | Ni   | P     | V    | Zn   | Al    |
|----------|--------|-------|------|------|------|-------|------|-------|------|-------|------|------|-------|
| Seasonal | Autumn | 106.3 | 60.5 | 14.7 | 31.2 | 33793 | 7.71 | 619.6 | 49.9 | 673.2 | 80.2 | 51.9 | 23802 |
|          | Winter | 92.5  | 44.1 | 15.5 | 30.2 | 34128 | 7.82 | 542.2 | 47.3 | 602.4 | 72.1 | 58.3 | 24380 |
|          | Spring | 95.2  | 50.6 | 15.3 | 33.4 | 34546 | 6.66 | 578.2 | 50.1 | 582.5 | 80.3 | 54.4 | 24150 |
|          | Summer | 88.3  | 46.3 | 14.7 | 29.7 | 32659 | 8.14 | 546.8 | 45.8 | 614.4 | 61.8 | 49.6 | 26422 |

**Table S3.** Sediment metal correlation in the watershed.

[illegible]

**Table S4.** Riparian soil metal correlation in the watershed.

[illegible]

**Table S5.** Seasonal ANOVA test results of the watershed metals.

|    |                | ANOVA          |    |             |       |       |
|----|----------------|----------------|----|-------------|-------|-------|
|    |                | Sum of Squares | df | Mean Square | F     | Sig.  |
| Ba | Between Groups | 0.171          | 3  | 0.057       | 0.303 | 0.823 |
|    | Within Groups  | 6.018          | 32 | 0.188       |       |       |
|    | Total          | 6.189          | 35 |             |       |       |
| Cr | Between Groups | 0.496          | 3  | 0.165       | 0.604 | 0.617 |
|    | Within Groups  | 8.769          | 32 | 0.274       |       |       |
|    | Total          | 9.266          | 35 |             |       |       |
| Co | Between Groups | 0.046          | 3  | 0.015       | 0.524 | 0.669 |
|    | Within Groups  | 0.932          | 32 | 0.029       |       |       |
|    | Total          | 0.978          | 35 |             |       |       |
| Cu | Between Groups | 0.182          | 3  | 0.061       | 0.728 | 0.543 |
|    | Within Groups  | 2.661          | 32 | 0.083       |       |       |
|    | Total          | 2.843          | 35 |             |       |       |
| Fe | Between Groups | 0.042          | 3  | 0.014       | 0.378 | 0.769 |
|    | Within Groups  | 1.174          | 32 | 0.037       |       |       |
|    | Total          | 1.216          | 35 |             |       |       |
| Pb | Between Groups | 0.590          | 3  | 0.197       | 2.936 | 0.048 |
|    | Within Groups  | 2.142          | 32 | 0.067       |       |       |
|    | Total          | 2.732          | 35 |             |       |       |
| Mn | Between Groups | 0.059          | 3  | 0.020       | 0.220 | 0.882 |
|    | Within Groups  | 2.850          | 32 | 0.089       |       |       |
|    | Total          | 2.909          | 35 |             |       |       |
| Ni | Between Groups | 0.053          | 3  | 0.018       | 0.039 | 0.989 |
|    | Within Groups  | 14.439         | 32 | 0.451       |       |       |
|    | Total          | 14.492         | 35 |             |       |       |
| P  | Between Groups | 0.377          | 3  | 0.126       | 3.837 | 0.019 |
|    | Within Groups  | 1.049          | 32 | 0.033       |       |       |
|    | Total          | 1.427          | 35 |             |       |       |
| V  | Between Groups | 0.282          | 3  | 0.094       | 1.129 | 0.352 |
|    | Within Groups  | 2.660          | 32 | 0.083       |       |       |
|    | Total          | 2.942          | 35 |             |       |       |
| Zn | Between Groups | 0.057          | 3  | 0.019       | 0.896 | 0.454 |
|    | Within Groups  | 0.673          | 32 | 0.021       |       |       |
|    | Total          | 0.729          | 35 |             |       |       |
| Al | Between Groups | 0.347          | 3  | 0.116       | 1.718 | 0.183 |
|    | Within Groups  | 2.153          | 32 | 0.067       |       |       |
|    | Total          | 2.500          | 35 |             |       |       |

**Table S6.** Spatial ANOVA test results of the watershed metals.

|    |                | ANOVA          |    |             |        |       |
|----|----------------|----------------|----|-------------|--------|-------|
|    |                | Sum of Squares | df | Mean Square | F      | Sig.  |
| Ba | Between Groups | 4.616          | 8  | 0.577       | 9.908  | 0.000 |
|    | Within Groups  | 1.572          | 27 | 0.058       |        |       |
|    | Total          | 6.189          | 35 |             |        |       |
| Cr | Between Groups | 7.877          | 8  | 0.985       | 19.139 | 0.000 |
|    | Within Groups  | 1.389          | 27 | 0.051       |        |       |
|    | Total          | 9.266          | 35 |             |        |       |
| Co | Between Groups | 0.462          | 8  | 0.058       | 3.028  | 0.015 |
|    | Within Groups  | 0.515          | 27 | 0.019       |        |       |
|    | Total          | 0.978          | 35 |             |        |       |
| Cu | Between Groups | 1.552          | 8  | 0.194       | 4.056  | 0.003 |
|    | Within Groups  | 1.291          | 27 | 0.048       |        |       |
|    | Total          | 2.843          | 35 |             |        |       |
| Fe | Between Groups | 0.888          | 8  | 0.111       | 9.131  | 0.000 |
|    | Within Groups  | 0.328          | 27 | 0.012       |        |       |

|    |                |        |    |       |        |       |
|----|----------------|--------|----|-------|--------|-------|
| Pb | Total          | 1.216  | 35 |       |        |       |
|    | Between Groups | 1.576  | 8  | 0.197 | 4.600  | 0.001 |
|    | Within Groups  | 1.156  | 27 | 0.043 |        |       |
| Mn | Total          | 2.732  | 35 |       |        |       |
|    | Between Groups | 2.355  | 8  | 0.294 | 14.328 | 0.000 |
|    | Within Groups  | 0.555  | 27 | 0.021 |        |       |
| Ni | Total          | 2.909  | 35 |       |        |       |
|    | Between Groups | 13.546 | 8  | 1.693 | 48.308 | 0.000 |
|    | Within Groups  | 0.946  | 27 | 0.035 |        |       |
| P  | Total          | 14.492 | 35 |       |        |       |
|    | Between Groups | 0.705  | 8  | 0.088 | 3.299  | 0.009 |
|    | Within Groups  | 0.721  | 27 | 0.027 |        |       |
| V  | Total          | 1.427  | 35 |       |        |       |
|    | Between Groups | 2.139  | 8  | 0.267 | 8.988  | 0.000 |
|    | Within Groups  | 0.803  | 27 | 0.030 |        |       |
| Zn | Total          | 2.942  | 35 |       |        |       |
|    | Between Groups | 0.301  | 8  | 0.038 | 2.371  | 0.045 |
|    | Within Groups  | 0.428  | 27 | 0.016 |        |       |
| Al | Total          | 0.729  | 35 |       |        |       |
|    | Between Groups | 1.533  | 8  | 0.192 | 5.350  | 0.000 |
|    | Within Groups  | 0.967  | 27 | 0.036 |        |       |
|    | Total          | 2.500  | 35 |       |        |       |

**Table S7.** Sediment and riparian soil factor analysis result.

| Component |   | Initial Eigenvalues |               |              | Rotation Sums of Squared Loadings |               |              |
|-----------|---|---------------------|---------------|--------------|-----------------------------------|---------------|--------------|
|           |   | Total               | % of Variance | Cumulative % | Total                             | % of Variance | Cumulative % |
| Sediment  | 1 | 4.802               | 40.017        | 40.017       | 4.393                             | 36.609        | 36.609       |
|           | 2 | 3.923               | 32.695        | 72.711       | 3.928                             | 32.736        | 69.345       |
|           | 3 | 2.314               | 19.285        | 91.997       | 2.718                             | 22.652        | 91.997       |
| Soil      | 1 | 5.216               | 43.463        | 43.463       | 4.699                             | 39.157        | 39.157       |
|           | 2 | 3.486               | 29.054        | 72.517       | 3.768                             | 31.401        | 70.559       |
|           | 3 | 1.423               | 11.856        | 84.373       | 1.658                             | 13.815        | 84.373       |

**Table S8.** Soil and sediment PCA rotated component matrix.

|    | Soil          |               |              | Sediment      |               |               |
|----|---------------|---------------|--------------|---------------|---------------|---------------|
|    | Component     |               |              | Component     |               |               |
|    | 1             | 2             | 3            | 1             | 2             | 3             |
| Ba | -0.050        | <b>-0.961</b> | -0.117       | -0.607        | <b>0.643</b>  | -0.452        |
| Cr | 0.046         | <b>0.963</b>  | -0.139       | 0.072         | <b>-0.963</b> | -0.163        |
| Co | <b>0.835</b>  | 0.421         | -0.142       | <b>0.820</b>  | -0.459        | 0.205         |
| Cu | <b>0.880</b>  | -0.104        | -0.244       | <b>0.632</b>  | -0.067        | 0.740         |
| Fe | <b>0.934</b>  | -0.145        | 0.181        | <b>0.832</b>  | 0.449         | 0.209         |
| Pb | 0.102         | -0.043        | <b>0.966</b> | -0.087        | 0.156         | <b>-0.972</b> |
| Mn | <b>-0.843</b> | -0.479        | -0.091       | <b>-0.818</b> | 0.232         | 0.186         |
| Ni | -0.083        | <b>0.946</b>  | -0.194       | 0.073         | <b>-0.953</b> | -0.127        |
| P  | <b>0.641</b>  | 0.311         | 0.228        | 0.264         | <b>0.846</b>  | -0.290        |
| V  | <b>0.823</b>  | -0.239        | 0.347        | <b>0.768</b>  | 0.508         | 0.297         |
| Zn | <b>0.705</b>  | 0.007         | 0.441        | <b>0.930</b>  | 0.065         | -0.081        |
| Al | -0.197        | <b>-0.655</b> | -0.409       | -0.221        | 0.455         | <b>0.824</b>  |

Extraction Method: Principal Component Analysis.

Rotation Method: Varimax with Kaiser Normalization.

**Table S9.** Sediment risk assessment values.



|      |    |       |        |        |        |        |        |        |        |        |      |      |
|------|----|-------|--------|--------|--------|--------|--------|--------|--------|--------|------|------|
|      | Zn | 0.81  | 0.62   | 0.73   | 0.65   | 0.84   | 0.66   | 1.04   | 0.71   | 0.92   | 1.07 | 4.44 |
| EF   | Co | 2.32  | 3.61   | 3.90   | 3.59   | 3.23   | 4.67   | 4.30   | 3.62   | 3.53   |      |      |
|      | Cr | 1.74  | 1.81   | 2.39   | 1.80   | 1.66   | 5.83   | 4.23   | 3.61   | 2.49   |      |      |
|      | Cu | 3.17  | 4.86   | 4.84   | 5.37   | 5.03   | 5.58   | 5.85   | 4.08   | 4.98   |      |      |
|      | Fe | 1.80  | 2.62   | 3.26   | 3.38   | 2.70   | 3.33   | 3.07   | 2.60   | 2.51   |      |      |
|      | Mn | 15.84 | 6.28   | 6.98   | 7.23   | 6.93   | 7.28   | 5.63   | 6.03   | 7.03   |      |      |
|      | Ni | 6.89  | 6.07   | 7.19   | 5.08   | 4.94   | 18.48  | 19.17  | 9.00   | 10.20  |      |      |
|      | Pb | 1.46  | 1.50   | 4.19   | 1.76   | 1.79   | 2.27   | 1.91   | 1.35   | 1.69   |      |      |
|      | V  | 2.30  | 3.09   | 4.41   | 4.62   | 3.56   | 4.05   | 3.92   | 3.33   | 2.92   |      |      |
|      | Zn | 2.41  | 3.01   | 4.18   | 3.16   | 3.30   | 3.59   | 3.88   | 3.16   | 3.09   |      |      |
| Igeo | Al | -2.16 | -2.88  | -3.10  | -2.87  | -2.56  | -3.02  | -2.49  | -2.73  | -2.33  |      |      |
|      | Co | -0.94 | -1.02  | -1.13  | -1.03  | -0.87  | -0.80  | -0.39  | -0.88  | -0.51  |      |      |
|      | Cr | -1.36 | -2.02  | -1.84  | -2.03  | -1.83  | -0.48  | -0.41  | -0.88  | -1.02  |      |      |
|      | Cu | -0.50 | -0.60  | -0.82  | -0.45  | -0.23  | -0.54  | 0.06   | -0.71  | -0.02  |      |      |
|      | Fe | -1.31 | -1.48  | -1.39  | -1.12  | -1.12  | -1.29  | -0.87  | -1.35  | -1.01  |      |      |
|      | Mn | 1.82  | -0.23  | -0.30  | -0.02  | 0.24   | -0.16  | 0.00   | -0.14  | 0.48   |      |      |
|      | Ni | 0.62  | -0.28  | -0.25  | -0.53  | -0.25  | 1.19   | 1.77   | 0.43   | 1.02   |      |      |
|      | Pb | -1.61 | -2.30  | -1.03  | -2.06  | -1.71  | -1.84  | -1.56  | -2.30  | -1.57  |      |      |
|      | V  | -0.96 | -1.25  | -0.96  | -0.66  | -0.73  | -1.00  | -0.52  | -1.00  | -0.79  |      |      |
|      | Zn | -0.89 | -1.28  | -1.04  | -1.21  | -0.83  | -1.18  | -0.53  | -1.07  | -0.70  |      |      |
| RI   |    | 31.36 | 22.12  | 24.30  | 23.36  | 26.57  | 38.62  | 55.27  | 28.46  | 40.17  |      |      |
| MRI  |    | 93.55 | 108.33 | 138.76 | 113.92 | 104.27 | 208.94 | 207.31 | 126.26 | 134.88 |      |      |

**Table S11.** Seasonal metal risk assessment results in the watershed.

|        |    |      |      |      |      |      |      |      |      |      | PI   | MPI   |
|--------|----|------|------|------|------|------|------|------|------|------|------|-------|
| autumn |    | 1    | 2    | 3    | 4    | 5    | 6    | 7    | 8    | 9    |      |       |
| CF     | Cr | 0.49 | 0.56 | 0.22 | 0.25 | 0.28 | 0.43 | 1.13 | 1.00 | 1.25 | 0.99 | 4.14  |
|        | Co | 0.63 | 0.72 | 0.47 | 0.53 | 0.58 | 0.94 | 1.21 | 0.95 | 1.24 | 1.05 | 4.41  |
|        | Cu | 1.00 | 0.90 | 0.56 | 0.69 | 0.74 | 1.57 | 1.49 | 1.04 | 1.42 | 1.33 | 5.48  |
|        | Pb | 0.48 | 0.26 | 0.21 | 0.20 | 0.32 | 0.12 | 0.38 | 0.31 | 0.42 | 0.40 | 1.97  |
|        | Ni | 1.72 | 0.94 | 0.65 | 0.70 | 0.72 | 1.26 | 5.31 | 3.89 | 5.91 | 4.49 | 17.17 |
|        | V  | 0.61 | 0.60 | 0.47 | 0.69 | 1.00 | 1.37 | 0.92 | 0.72 | 0.86 | 1.12 | 5.96  |
|        | Zn | 0.56 | 0.52 | 0.45 | 0.46 | 0.53 | 0.68 | 0.87 | 0.71 | 0.86 | 0.76 | 3.52  |
|        | Al | 0.29 | 0.19 | 0.13 | 0.14 | 0.14 | 0.30 | 0.25 | 0.20 | 0.27 | 0.26 |       |
| EF     | Cr | 1.70 | 2.96 | 1.64 | 1.79 | 2.03 | 1.40 | 4.53 | 5.11 | 4.65 |      |       |
|        | Co | 2.17 | 3.79 | 3.58 | 3.81 | 4.25 | 3.10 | 4.86 | 4.86 | 4.62 |      |       |
|        | Cu | 3.45 | 4.72 | 4.29 | 4.90 | 5.49 | 5.16 | 5.96 | 5.29 | 5.27 |      |       |

|      |    |       |       |       |       |       |        |        |        |        |  |
|------|----|-------|-------|-------|-------|-------|--------|--------|--------|--------|--|
|      | Pb | 1.64  | 1.39  | 1.61  | 1.43  | 2.35  | 0.41   | 1.51   | 1.59   | 1.57   |  |
|      | Ni | 5.95  | 4.95  | 4.91  | 5.01  | 5.31  | 4.16   | 21.30  | 19.86  | 21.96  |  |
|      | V  | 2.12  | 3.15  | 3.61  | 4.92  | 7.41  | 4.50   | 3.70   | 3.66   | 3.18   |  |
|      | Zn | 1.93  | 2.74  | 3.40  | 3.27  | 3.90  | 2.25   | 3.50   | 3.64   | 3.18   |  |
| Igeo | Cr | -1.61 | -1.42 | -2.79 | -2.58 | -2.45 | -1.82  | -0.41  | -0.58  | -0.26  |  |
|      | Co | -1.25 | -1.06 | -1.67 | -1.49 | -1.38 | -0.67  | -0.31  | -0.66  | -0.27  |  |
|      | Cu | -0.58 | -0.74 | -1.41 | -1.13 | -1.01 | 0.06   | -0.01  | -0.53  | -0.08  |  |
|      | Pb | -1.65 | -2.50 | -2.82 | -2.91 | -2.24 | -3.60  | -1.99  | -2.27  | -1.82  |  |
|      | Ni | 0.20  | -0.67 | -1.22 | -1.10 | -1.06 | -0.25  | 1.82   | 1.37   | 1.98   |  |
|      | V  | -1.29 | -1.33 | -1.66 | -1.13 | -0.58 | -0.14  | -0.70  | -1.07  | -0.81  |  |
|      | Zn | -1.43 | -1.53 | -1.74 | -1.72 | -1.51 | -1.13  | -0.78  | -1.07  | -0.81  |  |
|      | Al | -2.37 | -2.98 | -3.51 | -3.42 | -3.47 | -2.30  | -2.59  | -2.94  | -2.48  |  |
| RI   |    | 31.44 | 27.47 | 17.82 | 22.61 | 24.46 | 38.16  | 60.89  | 47.22  | 66.18  |  |
| MRI  |    | 108.4 | 144.7 | 135.4 | 161.6 | 180.6 | 125.67 | 244.36 | 241.12 | 245.98 |  |

|        |    |       |       |       |       |       |       |       |       |       | PI   | MPI   |
|--------|----|-------|-------|-------|-------|-------|-------|-------|-------|-------|------|-------|
| winter |    | 1     | 2     | 3     | 4     | 5     | 6     | 7     | 8     | 9     |      |       |
| CF     | Cr | 0.30  | 0.19  | 0.12  | 0.27  | 0.34  | 0.26  | 0.86  | 0.89  | 0.97  | 0.76 | 3.46  |
|        | Co | 0.73  | 0.60  | 0.48  | 0.68  | 0.67  | 1.21  | 1.06  | 0.99  | 1.13  | 1.04 | 4.27  |
|        | Cu | 0.89  | 0.53  | 0.41  | 1.04  | 1.22  | 1.97  | 1.26  | 1.02  | 1.53  | 1.59 | 4.99  |
|        | Pb | 0.28  | 0.34  | 0.22  | 0.42  | 0.56  | 0.31  | 0.44  | 0.34  | 0.59  | 0.50 | 2.15  |
|        | Ni | 0.76  | 1.03  | 0.55  | 1.12  | 1.18  | 0.73  | 4.50  | 4.88  | 5.12  | 3.94 | 18.71 |
|        | V  | 0.53  | 0.43  | 0.35  | 0.60  | 0.66  | 1.47  | 0.77  | 0.56  | 0.66  | 1.15 | 3.04  |
|        | Zn | 0.43  | 0.53  | 0.41  | 0.64  | 1.09  | 0.86  | 0.67  | 0.61  | 1.01  | 0.91 | 4.03  |
|        | Al | 0.28  | 0.31  | 0.16  | 0.20  | 0.22  | 0.46  | 0.23  | 0.20  | 0.27  | 0.37 |       |
| EF     | Cr | 1.10  | 0.61  | 0.78  | 1.35  | 1.56  | 0.57  | 3.82  | 4.48  | 3.53  |      |       |
|        | Co | 2.64  | 1.94  | 3.05  | 3.36  | 3.05  | 2.66  | 4.72  | 5.00  | 4.14  |      |       |
|        | Cu | 3.21  | 1.72  | 2.57  | 5.17  | 5.53  | 4.31  | 5.58  | 5.16  | 5.59  |      |       |
|        | Pb | 1.00  | 1.11  | 1.41  | 2.08  | 2.57  | 0.67  | 1.96  | 1.72  | 2.17  |      |       |
|        | Ni | 2.77  | 3.34  | 3.46  | 5.57  | 5.36  | 1.59  | 19.98 | 24.69 | 18.69 |      |       |
|        | V  | 1.92  | 1.41  | 2.24  | 2.97  | 2.99  | 3.23  | 3.42  | 2.82  | 2.42  |      |       |
|        | Zn | 1.55  | 1.73  | 2.56  | 3.21  | 4.94  | 1.88  | 2.98  | 3.09  | 3.69  |      |       |
|        | Al | -2.31 | -2.99 | -3.60 | -2.47 | -2.13 | -2.54 | -0.80 | -0.76 | -0.63 |      |       |
| Igeo   | Cr | -1.04 | -1.33 | -1.63 | -1.15 | -1.16 | -0.31 | -0.50 | -0.60 | -0.40 |      |       |
|        | Co | -0.76 | -1.50 | -1.88 | -0.53 | -0.30 | 0.39  | -0.25 | -0.55 | 0.03  |      |       |
|        | Pb | -2.44 | -2.14 | -2.75 | -1.84 | -1.41 | -2.29 | -1.77 | -2.14 | -1.34 |      |       |
|        | Ni | -0.97 | -0.55 | -1.45 | -0.42 | -0.35 | -1.04 | 1.58  | 1.70  | 1.77  |      |       |
|        | V  | -1.50 | -1.79 | -2.08 | -1.33 | -1.19 | -0.03 | -0.96 | -1.42 | -1.18 |      |       |
|        | Zn | -1.81 | -1.50 | -1.89 | -1.22 | -0.46 | -0.80 | -1.16 | -1.30 | -0.57 |      |       |
|        | Al | -2.44 | -2.29 | -3.24 | -2.90 | -2.77 | -1.71 | -2.74 | -2.92 | -2.45 |      |       |
|        | Al | -2.44 | -2.29 | -3.24 | -2.90 | -2.77 | -1.71 | -2.74 | -2.92 | -2.45 |      |       |
| RI     |    | 22.08 | 25.57 | 14.64 | 26.50 | 31.27 | 38.30 | 54.03 | 50.72 | 62.73 |      |       |
| MRI    |    | 80.09 | 83.12 | 92.39 | 131.7 | 142.0 | 83.80 | 240.0 | 256.3 | 229.2 |      |       |

|        |    |      |      |      |      |      |      |      |      |      | PI   | MPI   |
|--------|----|------|------|------|------|------|------|------|------|------|------|-------|
| spring |    | 1    | 2    | 3    | 4    | 5    | 6    | 7    | 8    | 9    |      |       |
| CF     | Cr | 0.38 | 0.35 | 0.13 | 0.27 | 0.19 | 0.26 | 1.48 | 0.82 | 0.88 | 1.11 | 5.32  |
|        | Co | 0.75 | 0.69 | 0.45 | 0.75 | 0.63 | 1.18 | 1.21 | 0.88 | 1.03 | 1.04 | 4.80  |
|        | Cu | 1.37 | 0.90 | 0.44 | 1.11 | 1.63 | 2.74 | 1.11 | 0.81 | 1.26 | 2.13 | 5.77  |
|        | Pb | 0.59 | 0.29 | 0.23 | 0.39 | 0.26 | 0.26 | 0.48 | 0.33 | 0.47 | 0.49 | 1.95  |
|        | Ni | 2.05 | 0.77 | 0.53 | 1.09 | 0.76 | 0.89 | 6.45 | 3.73 | 4.59 | 4.85 | 23.23 |
|        | V  | 0.54 | 0.48 | 0.37 | 0.83 | 0.64 | 1.35 | 0.90 | 0.68 | 0.64 | 1.08 | 3.68  |
|        | Zn | 0.90 | 0.50 | 0.39 | 0.60 | 0.44 | 0.84 | 0.69 | 0.56 | 0.81 | 0.78 | 3.14  |
|        | Al | 0.35 | 0.27 | 0.17 | 0.26 | 0.25 | 0.41 | 0.21 | 0.16 | 0.25 | 0.34 |       |
| EF     | Cr | 1.10 | 1.29 | 0.76 | 1.05 | 0.75 | 0.63 | 7.13 | 5.29 | 3.57 |      |       |
|        | Co | 2.17 | 2.59 | 2.70 | 2.90 | 2.55 | 2.86 | 5.83 | 5.64 | 4.17 |      |       |
|        | Cu | 3.95 | 3.37 | 2.68 | 4.30 | 6.57 | 6.60 | 5.36 | 5.18 | 5.12 |      |       |
|        | Pb | 1.72 | 1.07 | 1.39 | 1.52 | 1.05 | 0.64 | 2.30 | 2.11 | 1.91 |      |       |

|      |    |       |       |       |       |       |       |       |       |       |
|------|----|-------|-------|-------|-------|-------|-------|-------|-------|-------|
|      | Ni | 5.91  | 2.89  | 3.18  | 4.21  | 3.06  | 2.16  | 31.11 | 23.96 | 18.57 |
|      | V  | 1.55  | 1.79  | 2.22  | 3.18  | 2.58  | 3.26  | 4.34  | 4.33  | 2.57  |
|      | Zn | 2.59  | 1.86  | 2.37  | 2.30  | 1.78  | 2.03  | 3.33  | 3.62  | 3.29  |
| Igeo | Cr | -1.98 | -2.12 | -3.57 | -2.46 | -3.01 | -2.52 | -0.02 | -0.86 | -0.77 |
|      | Co | -1.00 | -1.11 | -1.75 | -1.00 | -1.25 | -0.34 | -0.31 | -0.77 | -0.54 |
|      | Cu | -0.13 | -0.73 | -1.76 | -0.43 | 0.12  | 0.87  | -0.43 | -0.89 | -0.25 |
|      | Pb | -1.34 | -2.38 | -2.71 | -1.93 | -2.53 | -2.50 | -1.65 | -2.19 | -1.67 |
|      | Ni | 0.45  | -0.95 | -1.51 | -0.46 | -0.99 | -0.75 | 2.10  | 1.32  | 1.61  |
|      | V  | -1.48 | -1.64 | -2.04 | -0.86 | -1.24 | -0.15 | -0.74 | -1.15 | -1.24 |
|      | Zn | -0.74 | -1.59 | -1.94 | -1.33 | -1.77 | -0.83 | -1.12 | -1.41 | -0.88 |
|      | Al | -2.12 | -2.48 | -3.18 | -2.53 | -2.60 | -1.86 | -2.85 | -3.27 | -2.60 |
| RI   |    | 39.05 | 21.71 | 15.67 | 30.67 | 24.89 | 39.62 | 70.10 | 44.21 | 54.96 |
| MRI  |    | 112.8 | 80.93 | 94.96 | 118.2 | 100.7 | 95.57 | 338.0 | 283.7 | 222.6 |

|        |    |       |       |       |       |       |       |       |       |       | PI   | MPI   |
|--------|----|-------|-------|-------|-------|-------|-------|-------|-------|-------|------|-------|
| summer |    | 1     | 2     | 3     | 4     | 5     | 6     | 7     | 8     | 9     |      |       |
| CF     | Cr | 0.26  | 0.25  | 0.15  | 0.28  | 0.24  | 0.43  | 1.03  | 0.82  | 0.71  | 0.80 | 3.66  |
|        | Co | 0.67  | 1.10  | 0.50  | 0.66  | 0.64  | 0.92  | 1.07  | 0.97  | 0.90  | 0.97 | 4.28  |
|        | Cu | 0.63  | 1.07  | 0.49  | 0.96  | 0.91  | 1.51  | 1.15  | 1.30  | 0.95  | 1.28 | 4.78  |
|        | Pb | 0.42  | 0.32  | 0.24  | 0.52  | 0.34  | 0.27  | 0.39  | 0.48  | 0.38  | 0.46 | 2.06  |
|        | Ni | 1.27  | 0.88  | 0.72  | 1.29  | 0.85  | 1.73  | 5.02  | 4.01  | 3.61  | 3.86 | 17.83 |
|        | V  | 0.55  | 0.48  | 0.34  | 0.55  | 0.61  | 1.00  | 0.78  | 0.55  | 0.60  | 0.83 | 3.15  |
|        | Zn | 0.59  | 0.48  | 0.38  | 0.62  | 0.68  | 0.63  | 0.68  | 0.79  | 0.62  | 0.71 | 2.89  |
|        | Al | 0.32  | 0.28  | 0.16  | 0.21  | 0.24  | 0.30  | 0.21  | 0.28  | 0.22  | 0.29 |       |
| EF     | Cr | 0.79  | 0.89  | 0.98  | 1.31  | 1.02  | 1.44  | 4.81  | 2.95  | 3.18  |      |       |
|        | Co | 2.07  | 3.97  | 3.21  | 3.09  | 2.70  | 3.09  | 5.01  | 3.46  | 4.01  |      |       |
|        | Cu | 1.96  | 3.84  | 3.12  | 4.52  | 3.88  | 5.07  | 5.39  | 4.66  | 4.25  |      |       |
|        | Pb | 1.31  | 1.14  | 1.54  | 2.45  | 1.45  | 0.91  | 1.85  | 1.73  | 1.71  |      |       |
|        | Ni | 3.92  | 3.15  | 4.58  | 6.07  | 3.62  | 5.80  | 23.55 | 14.39 | 16.15 |      |       |
|        | V  | 1.71  | 1.73  | 2.18  | 2.56  | 2.60  | 3.36  | 3.68  | 1.99  | 2.70  |      |       |
|        | Zn | 1.84  | 1.73  | 2.44  | 2.91  | 2.90  | 2.10  | 3.21  | 2.85  | 2.77  |      |       |
|        | Al |       |       |       |       |       |       |       |       |       |      |       |
| Igeo   | Cr | -2.55 | -2.60 | -3.29 | -2.42 | -2.65 | -1.80 | -0.55 | -0.87 | -1.08 |      |       |
|        | Co | -1.16 | -0.44 | -1.57 | -1.19 | -1.24 | -0.71 | -0.49 | -0.64 | -0.74 |      |       |
|        | Cu | -1.25 | -0.49 | -1.62 | -0.64 | -0.71 | 0.01  | -0.38 | -0.21 | -0.66 |      |       |
|        | Pb | -1.82 | -2.24 | -2.64 | -1.52 | -2.14 | -2.47 | -1.93 | -1.64 | -1.97 |      |       |
|        | Ni | -0.24 | -0.78 | -1.06 | -0.21 | -0.82 | 0.20  | 1.74  | 1.42  | 1.27  |      |       |
|        | V  | -1.44 | -1.64 | -2.13 | -1.46 | -1.29 | -0.58 | -0.94 | -1.44 | -1.31 |      |       |
|        | Zn | -1.34 | -1.64 | -1.97 | -1.27 | -1.14 | -1.26 | -1.13 | -0.92 | -1.28 |      |       |
|        | Al | -2.21 | -2.43 | -3.26 | -2.81 | -2.67 | -2.33 | -2.81 | -2.43 | -2.75 |      |       |
| RI     |    | 26.59 | 26.46 | 18.36 | 30.25 | 23.13 | 49.49 | 54.88 | 50.37 | 44.41 |      |       |
| MRI    |    | 82.23 | 95.05 | 117.0 | 141.6 | 98.27 | 166.1 | 257.3 | 180.5 | 198.8 |      |       |
